# Supplementary material for: Cut-off Values and Clinical Utility of Surrogate Markers for Insulin Resistance and Beta-Cell Function to Identify Metabolic Syndrome and Its Components among Southern Indian Adults
Source: PubMed Central journal article supplement — J Obes Metab Syndr. 2020 Nov 24;29(4):281–91. doi: 10.7570/jomes20071 (PMC7789024; doi:10.7570/jomes20071), 2020-11-24
Supplement: JOMES-29-281_Supple.pdf [file JOMES-29-281_Supple.pdf]

**Supplementary Table 1.** AUCs with 95% CIs for HOMA-IR, HOMA-AD, the TyG index, HOMA-1%S, QUICKI, the McAuley index, SPISE, and HOMA-2%B to identify MetS and its components

| Variable         | HOMA-IR             | HOMA-AD             | TyG index           | HOMA-1%S            | QUICKI              | McAuley index       | SPISE               | HOMA-2%B            |
|------------------|---------------------|---------------------|---------------------|---------------------|---------------------|---------------------|---------------------|---------------------|
| Central obesity  | 0.620 (0.538–0.698) | 0.649 (0.567–0.725) | 0.668 (0.587–0.743) | 0.638 (0.548–0.726) | 0.620 (0.537–0.698) | 0.651 (0.569–0.727) | 0.749 (0.671–0.816) | 0.581 (0.499–0.661) |
| Elevated glucose | 0.963 (0.919–0.987) | 0.893 (0.832–0.937) | 0.865 (0.799–0.915) | 0.960 (0.916–0.984) | 0.954 (0.907–0.982) | 0.796 (0.723–0.857) | 0.720 (0.641–0.790) | 0.894 (0.834–0.939) |
| Elevated TG      | 0.664 (0.583–0.739) | 0.666 (0.585–0.741) | 0.906 (0.848–0.948) | 0.664 (0.583–0.739) | 0.663 (0.581–0.738) | 0.895 (0.834–0.939) | 0.940 (0.889–0.972) | 0.558 (0.474–0.639) |
| Reduced HDL-C    | 0.745 (0.668–0.813) | 0.713 (0.634–0.784) | 0.724 (0.645–0.793) | 0.735 (0.658–0.803) | 0.738 (0.660–0.807) | 0.762 (0.680–0.827) | 0.768 (0.692–0.833) | 0.742 (0.664–0.810) |
| Elevated BP      | 0.675 (0.594–0.749) | 0.654 (0.572–0.729) | 0.663 (0.581–0.738) | 0.670 (0.589–0.744) | 0.672 (0.591–0.746) | 0.658 (0.576–0.733) | 0.607 (0.524–0.686) | 0.593 (0.509–0.672) |
| MetS             | 0.851 (0.784–0.904) | 0.846 (0.778–0.899) | 0.836 (0.767–0.891) | 0.850 (0.783–0.903) | 0.844 (0.776–0.898) | 0.815 (0.743–0.874) | 0.822 (0.751–0.880) | 0.842 (0.773–0.896) |

Values are presented as AUC (95% CI).

AUC, area under the curve; CI, confidence interval; HOMA, homeostatic model assessment; IR, insulin resistance; AD, adiponectin; TyG, triglyceride-glucose; %S, insulin sensitivity; QUICKI, quantitative insulin sensitivity check index; SPISE, single-point insulin sensitivity estimator; %B, beta-cell function; MetS, metabolic syndrome; TG, triglycerides; HDL-C, high-density lipoprotein cholesterol; BP, blood pressure.

**Supplementary Table 2.** Odds ratio of surrogate markers of IR and insulin secretion for MetS and its components

| Variable         | HOMA-IR             | HOMA-AD           | TyG index         | HOMA-1%S          | QUICKI            | McAuley index     | SPISE             | HOMA-2%B          |
|------------------|---------------------|-------------------|-------------------|-------------------|-------------------|-------------------|-------------------|-------------------|
| Central obesity  | 1.08 (0.97–1.20)    | 1.02 (0.99–1.05)  | 1.03 (0.96–1.10)  | 0.97 (0.95–1.00)  | 1.56* (0.90–2.13) | 2.24* (1.62–3.08) | 0.65 (0.49–0.85)  | 0.99 (0.98–1.00)  |
| Elevated glucose | 16.47* (6.12–28.44) | 1.95* (1.50–2.54) | 1.68* (1.37–2.04) | 1.77* (1.70–1.85) | 2.53* (2.02–3.17) | 3.34* (2.84–4.16) | 0.72 (0.58–0.90)  | 0.92 (0.90–0.95)  |
| Elevated TG      | 1.13* (1.01–1.27)   | 1.01 (0.99–1.04)  | 3.46* (2.32–4.83) | 1.03 (1.01–1.08)  | 2.46* (1.53–3.32) | 1.03 (0.93–1.14)  | 1.00 (0.97–1.03)  | 0.96 (0.93–0.98)  |
| Reduced HDL-C    | 1.27* (1.18–1.48)   | 1.23* (1.13–1.39) | 1.13* (1.04–1.23) | 0.92 (0.90–0.95)  | 2.02* (1.28–3.15) | 0.96 (0.94–1.01)  | 1.00 (0.98–1.01)  | 0.97 (0.95–0.99)  |
| Elevated BP      | 1.14* (1.01–1.29)   | 1.02 (0.99–1.04)  | 1.07 (1.01–1.15)  | 0.96 (0.93–0.98)  | 0.97 (0.95–1.15)  | 0.57 (0.54–0.60)  | 0.76 (0.61–0.96)  | 0.99 (0.98–1.01)  |
| MetS             | 2.24* (1.60–3.13)   | 1.42* (1.22–1.66) | 1.51* (1.28–1.78) | 0.88 (0.84–0.92)  | 2.19* (1.46–3.23) | 1.15* (1.03–1.29) | 1.03* (1.01–1.05) | 1.02* (1.01–1.03) |

Values are presented as odds ratio (95% confidence interval). Odds ratio with 95% confidence interval are presented with adjustment for age, sex, BMI, smoking, and alcohol intake. \* $P < 0.05$ .

IR, insulin resistance; MetS, metabolic syndrome; HOMA, homeostatic model assessment; AD, adiponectin; TyG, triglyceride-glucose; %S, insulin sensitivity; QUICKI, quantitative insulin sensitivity check index; SPISE, single-point insulin sensitivity estimator; %B, beta-cell function; TG, triglycerides; HDL-C, high-density lipoprotein cholesterol; BP, blood pressure.
